# Supplementary material for: Immunoglobulin E plays an immunoregulatory role in lupus
Source: PubMed Central journal article supplement — J Exp Med. 2014 Oct 20;211(11):2159–68. doi: 10.1084/jem.20140066 (PMC4203948; doi:10.1084/jem.20140066), 2014-10-20
Supplement: supp_jem.20140066_JEM_20140066_sm.pdf [file supp_jem.20140066_JEM_20140066_sm.pdf]

## SUPPLEMENTAL MATERIAL

Dema et al, <http://www.jem.org/cgi/content/full/jem.20140066/DC1>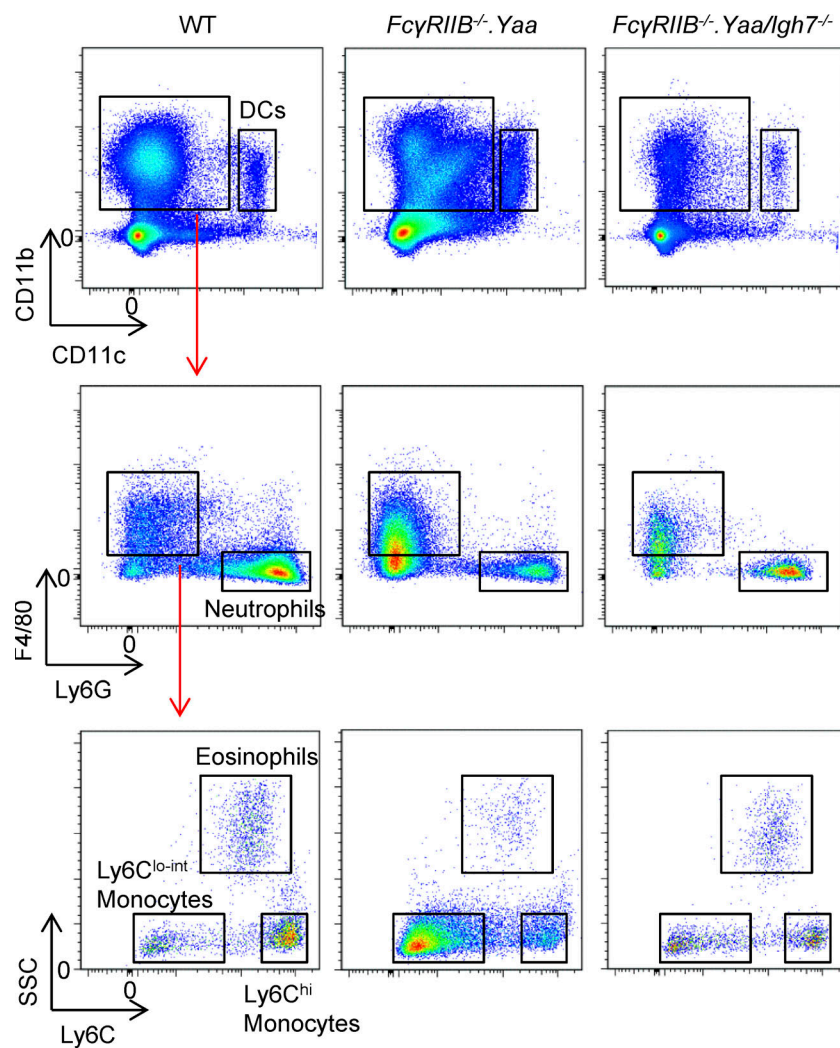

Figure S1. Representative gating strategy used to detect myeloid mouse cells by flow cytometry in three of the strains studied.
